# Supplementary material for: Mixed guanidinato-amido Ge(iv) and Sn(iv) complexes with GeE (E = S, Se) double bond and SnS4, Sn2Se2 rings
Source: Royal Society of Chemistry journal article supplement (doi:10.1039/c5ra24280k), 2015-12-16
Supplement: c5ra24280k1.pdf [file c5ra24280k1.pdf]

## **Electronic supplementary information (ESI)**

### **Mixed guanidinato-amido Ge(IV) and Sn(IV) complexes with Ge=E (E = S, Se) double bond and SnS<sub>4</sub>, Sn<sub>2</sub>Se<sub>2</sub> rings**

Milan Kr. Barman and Sharanappa Nembenna\*

National Institute of Science Education and Research (NISER), Bhubaneswar, 751005

INDIA

Email:snembenna@niser.ac.in

Tel: 0091-674-2304126. Fax: 0091-674-2302436

- Fig. S1 <sup>1</sup>H NMR Spectrum of [ArNC(N<sup>*i*</sup>Pr<sub>2</sub>)NAr]GeN(SiMe<sub>3</sub>)<sub>2</sub>S (**3**)
- Fig. S2 <sup>13</sup>C NMR Spectrum of [ArNC(N<sup>*i*</sup>Pr<sub>2</sub>)NAr]GeN(SiMe<sub>3</sub>)<sub>2</sub>S (**3**)
- Fig. S3 <sup>29</sup>Si NMR Spectrum of [ArNC(N<sup>*i*</sup>Pr<sub>2</sub>)NAr]GeN(SiMe<sub>3</sub>)<sub>2</sub>S (**3**)
- Fig. S4 <sup>1</sup>H NMR Spectrum of [ArNC(N<sup>*i*</sup>Pr<sub>2</sub>)NAr]GeN(SiMe<sub>3</sub>)<sub>2</sub>Se (**4**)
- Fig. S5 <sup>13</sup>C NMR Spectrum of [ArNC(N<sup>*i*</sup>Pr<sub>2</sub>)NAr]GeN(SiMe<sub>3</sub>)<sub>2</sub>Se (**4**)
- Fig. S6 <sup>29</sup>Si NMR Spectrum of [ArNC(N<sup>*i*</sup>Pr<sub>2</sub>)NAr]GeN(SiMe<sub>3</sub>)<sub>2</sub>Se (**4**)
- Fig. S7 <sup>1</sup>H NMR Spectrum of {[ArNC(N<sup>*i*</sup>Pr<sub>2</sub>)NAr]SnN(SiMe<sub>3</sub>)<sub>2</sub>}S<sub>4</sub> (**5**)
- Fig. S8 <sup>13</sup>C NMR Spectrum of {[ArNC(N<sup>*i*</sup>Pr<sub>2</sub>)NAr]SnN(SiMe<sub>3</sub>)<sub>2</sub>}S<sub>4</sub> (**5**)
- Fig. S9 <sup>29</sup>Si NMR Spectrum of {[ArNC(N<sup>*i*</sup>Pr<sub>2</sub>)NAr]SnN(SiMe<sub>3</sub>)<sub>2</sub>}S<sub>4</sub> (**5**)
- Fig. S10 <sup>1</sup>H NMR Spectrum of {[ArNC(N<sup>*i*</sup>Pr<sub>2</sub>)NAr] N(SiMe<sub>3</sub>)<sub>2</sub>Sn(μ-Se)}<sub>2</sub> (**6**)
- Fig. S11 <sup>13</sup>C NMR Spectrum of {[ArNC(N<sup>*i*</sup>Pr<sub>2</sub>)NAr] N(SiMe<sub>3</sub>)<sub>2</sub>Sn(μ-Se)}<sub>2</sub> (**6**)
- Fig. S12 <sup>29</sup>Si NMR Spectrum of {[ArNC(N<sup>*i*</sup>Pr<sub>2</sub>)NAr] N(SiMe<sub>3</sub>)<sub>2</sub>Sn(μ-Se)}<sub>2</sub> (**6**)
- Fig S13 and Fig S14 Computational studies

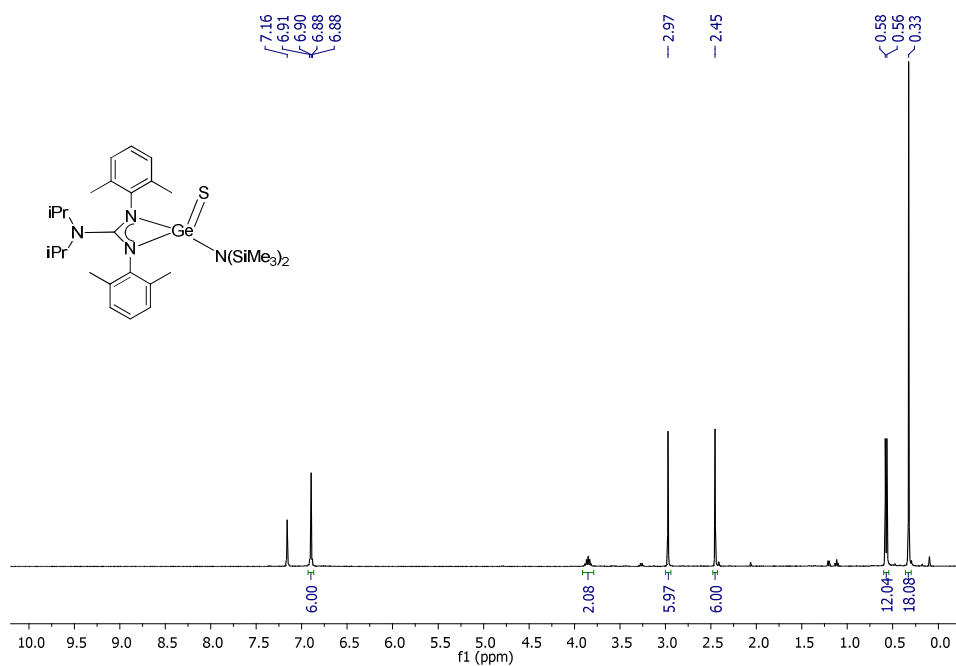

**Fig. S1:**  $^1\text{H}$  NMR Spectrum of  $[\{\text{ArNC}(\text{N}^i\text{Pr}_2)\text{NAr}\}\text{GeN}(\text{SiMe}_3)_2(\text{S})]$  (**3**) in  $\text{C}_6\text{D}_6$

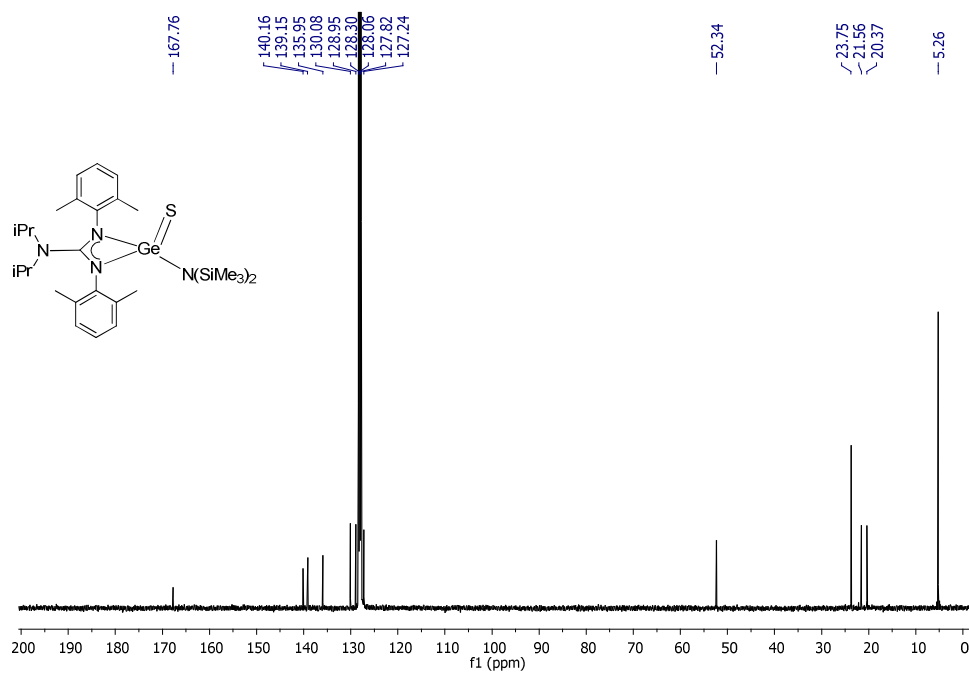

**Fig. S2:**  $^{13}\text{C}$  NMR Spectrum of  $[\{\text{ArNC}(\text{N}^i\text{Pr}_2)\text{NAr}\}\text{GeN}(\text{SiMe}_3)_2(\text{S})]$  (**3**) in  $\text{C}_6\text{D}_6$

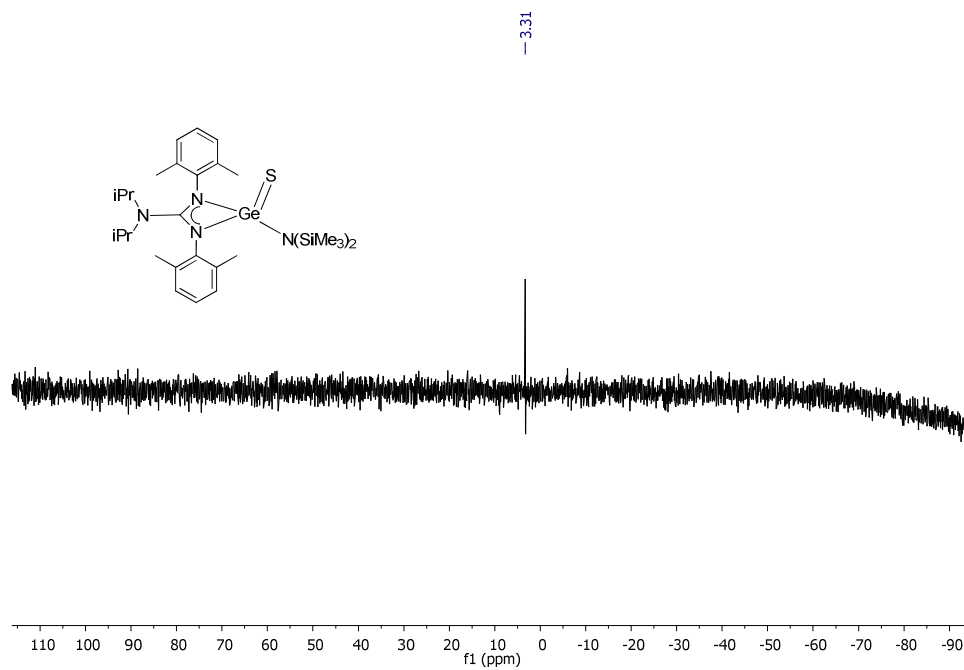

**Fig. S3:**  $^{29}\text{Si}$  NMR Spectrum of [ $\{\text{ArNC}(\text{N}^i\text{Pr}_2)\text{NAr}\}\text{GeN}(\text{SiMe}_3)_2(\text{S})$ ] (**3**) in  $\text{C}_6\text{D}_6$

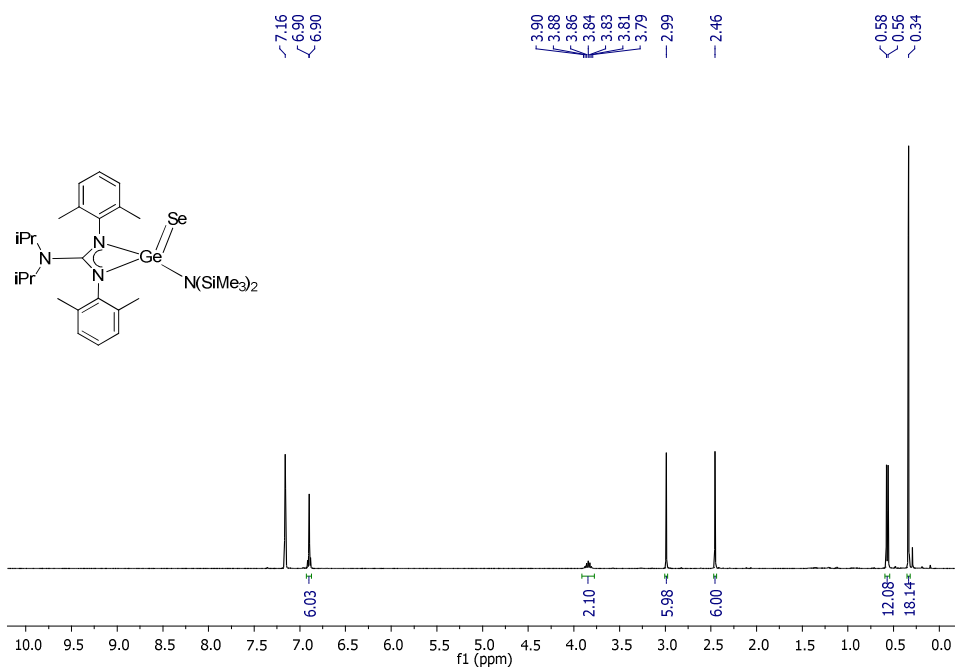

**Fig. S4:** <sup>1</sup>H NMR Spectrum of [**ArNC(N<sup>i</sup>Pr<sub>2</sub>)NAr**]**GeN(SiMe<sub>3</sub>)<sub>2</sub>(Se)** (**4**) in C<sub>6</sub>D<sub>6</sub>

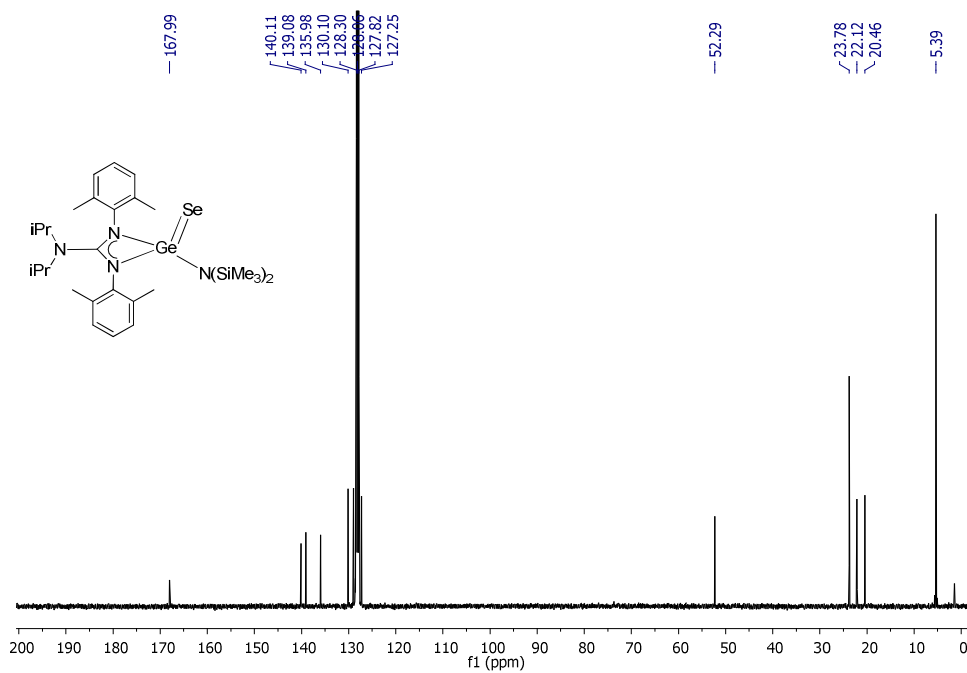

**Fig. S5:** <sup>13</sup>C NMR Spectrum of [**ArNC(N<sup>i</sup>Pr<sub>2</sub>)NAr**]**GeN(SiMe<sub>3</sub>)<sub>2</sub>(Se)** (**4**) in C<sub>6</sub>D<sub>6</sub>

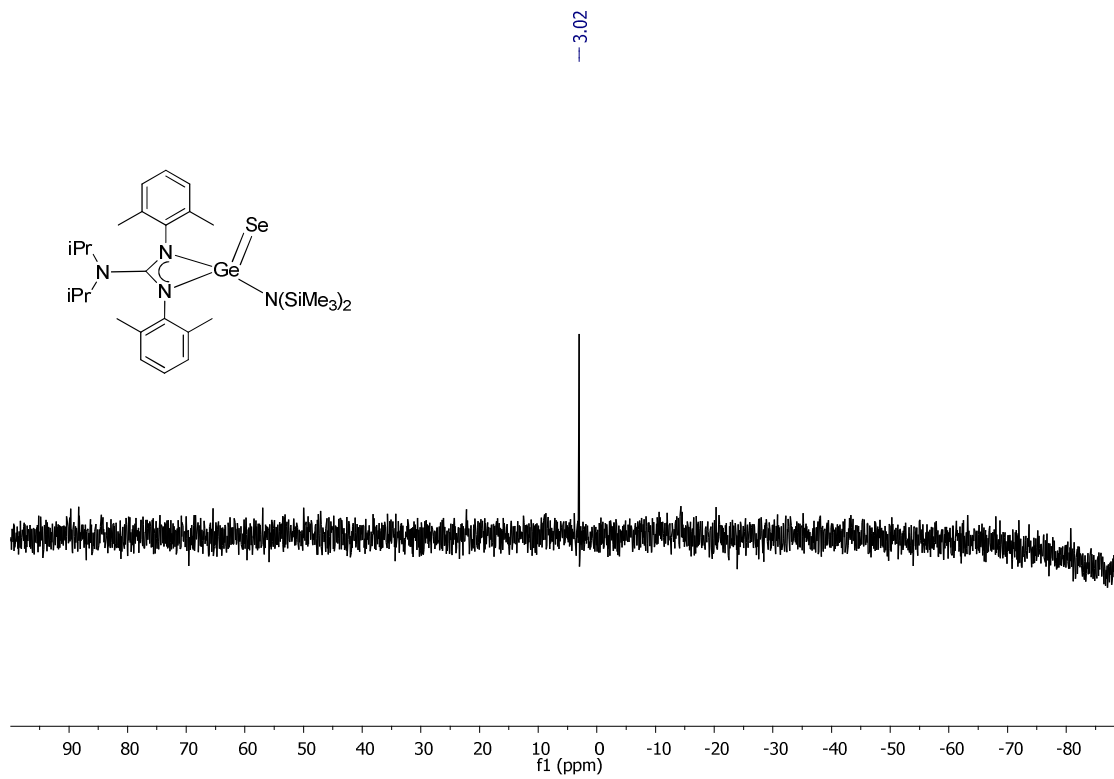

**Fig. S6:**  $^{29}\text{Si}$  NMR Spectrum of [ $\{\text{ArNC}(\text{N}^i\text{Pr}_2)\text{NAr}\}\text{GeN}(\text{SiMe}_3)_2(\text{Se})$ ] (**4**) in  $\text{C}_6\text{D}_6$

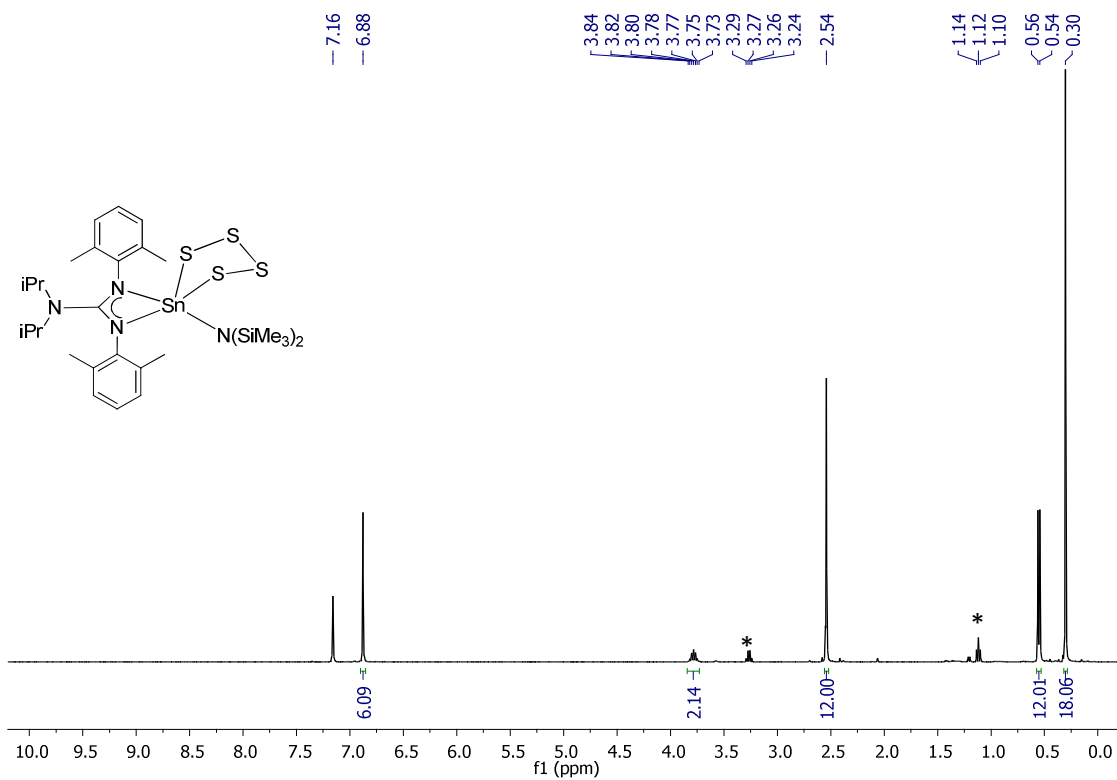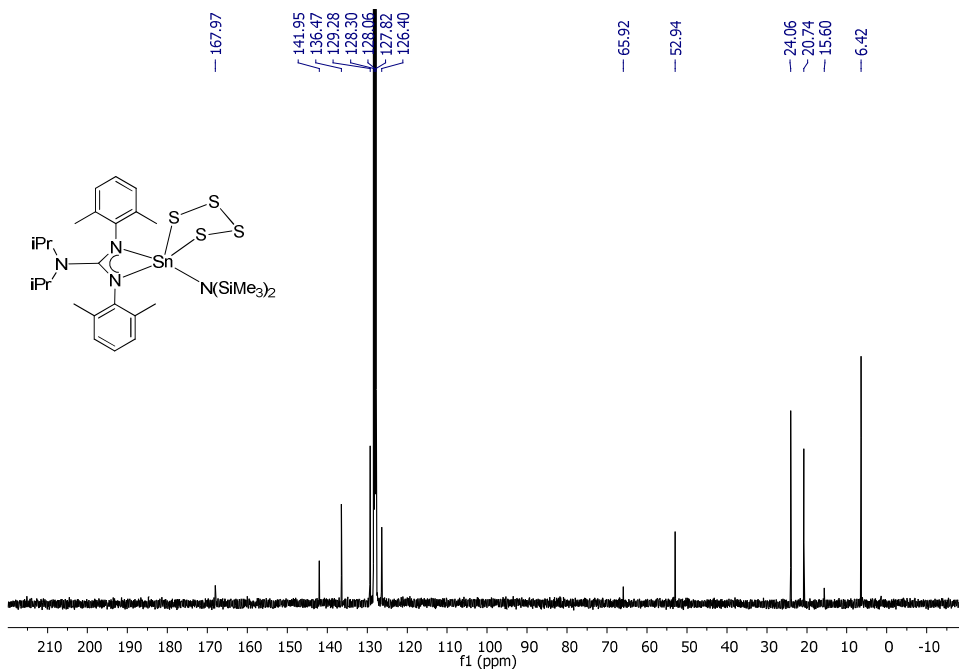

- 5.54

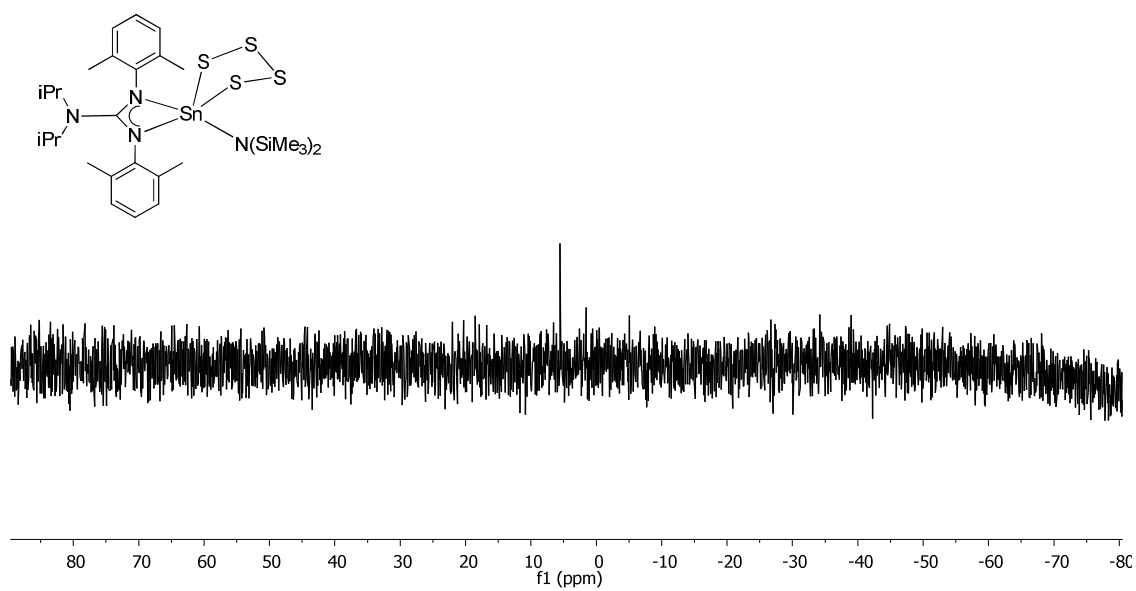

**Fig. S9:**  $^{29}\text{Si}$  NMR Spectrum of [ $\{\text{ArNC}(\text{N}^i\text{Pr}_2)\text{NAr}\}\text{SnN}(\text{SiMe}_3)_2(\text{S}_4)$ ] (**5**) in  $\text{C}_6\text{D}_6$

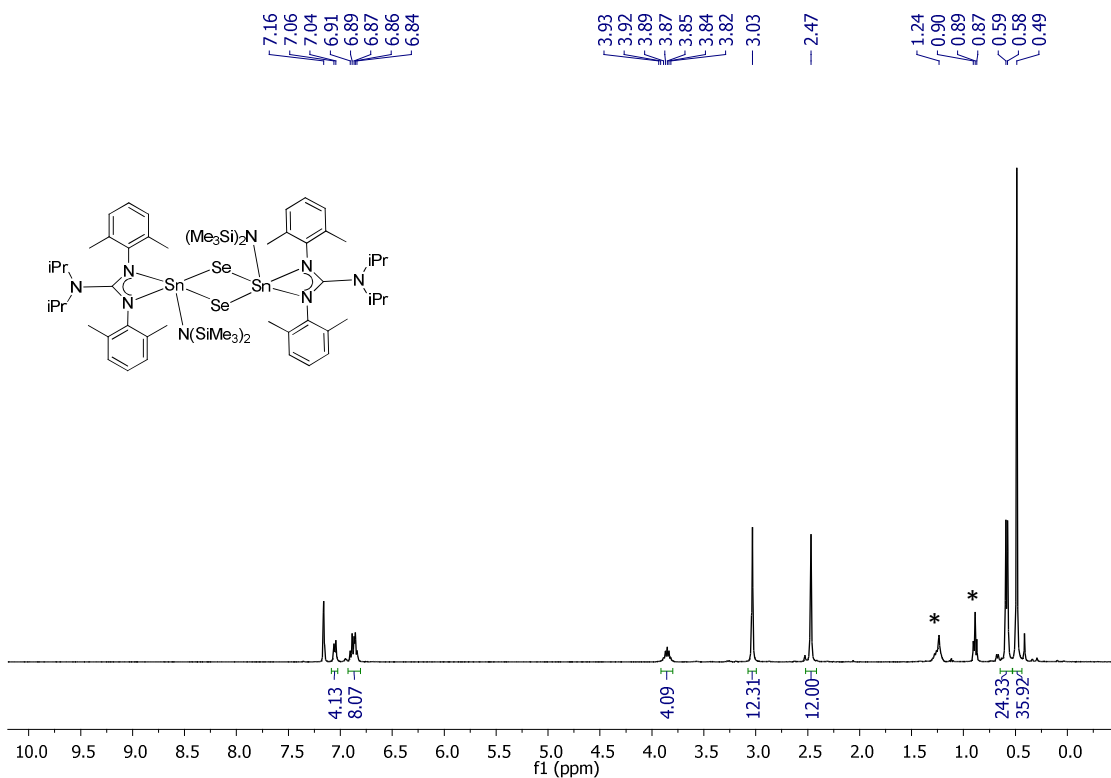

**Fig. S10:**  $^1\text{H}$  NMR Spectrum of  $[\{\text{ArNC}(\text{N}^i\text{Pr}_2)\text{NArN}(\text{SiMe}_3)_2\text{Sn}(\mu\text{-Se})\}_2]$  (**6**) in  $\text{C}_6\text{D}_6$  (\* = hexane impurities)

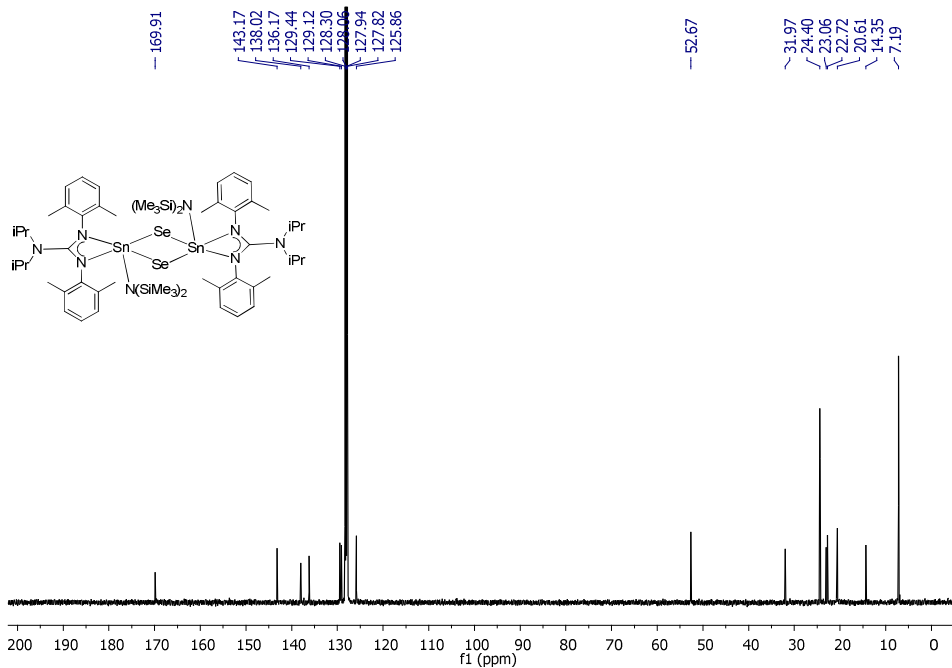

**Fig. S11:**  $^{13}\text{C}$  NMR Spectrum of  $[\{\text{ArNC}(\text{N}^i\text{Pr}_2)\text{NArN}(\text{SiMe}_3)_2\text{Sn}(\mu\text{-Se})\}_2]$  (**6**) in  $\text{C}_6\text{D}_6$



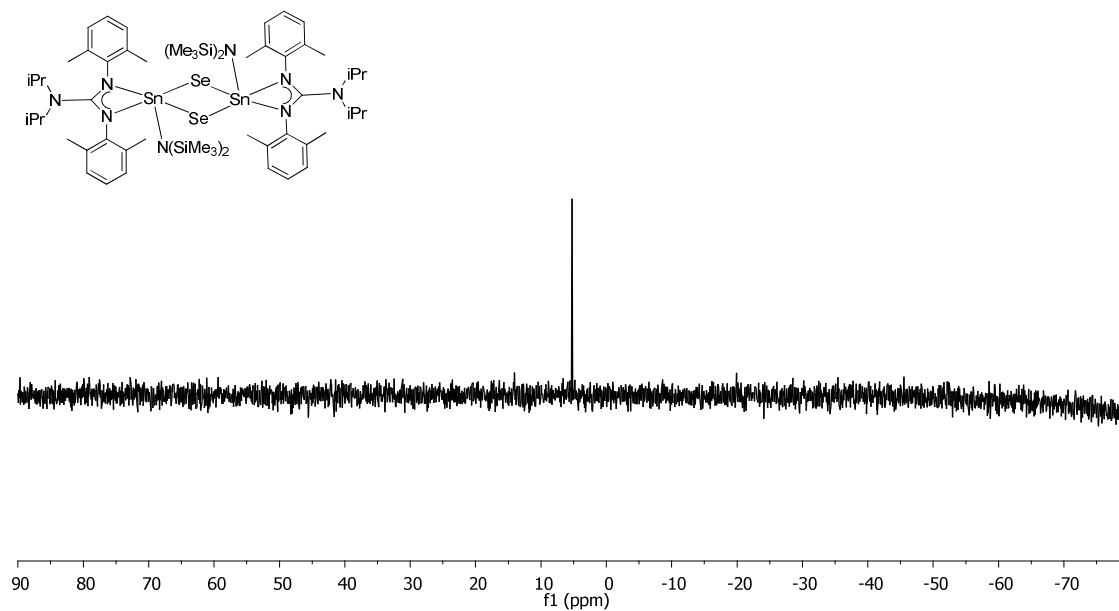

**Fig. S12:**  $^{29}\text{Si}$  NMR Spectrum of  $[\{\text{ArNC}(\text{N}^i\text{Pr}_2)\text{NArN}(\text{SiMe}_3)_2\text{Sn}(\mu\text{-Se})\}_2]$  (**6**) in  $\text{C}_6\text{D}_6$

### Computational studies

The Wiberg Bond Index (WBI) was computed at B3LYP/6-31+G(d) level of theory. The atomic coordinates were taken from the .cif files of compounds **3** & **4** and no further geometry optimization was carried out. The Wiberg Bond Index (WBI) of Ge–S in compound **3** and Ge–Se in compound **4** are 1.49 and 1.52, respectively, indicating the the existence of double bond between germanium and sulfur or selenium atoms.

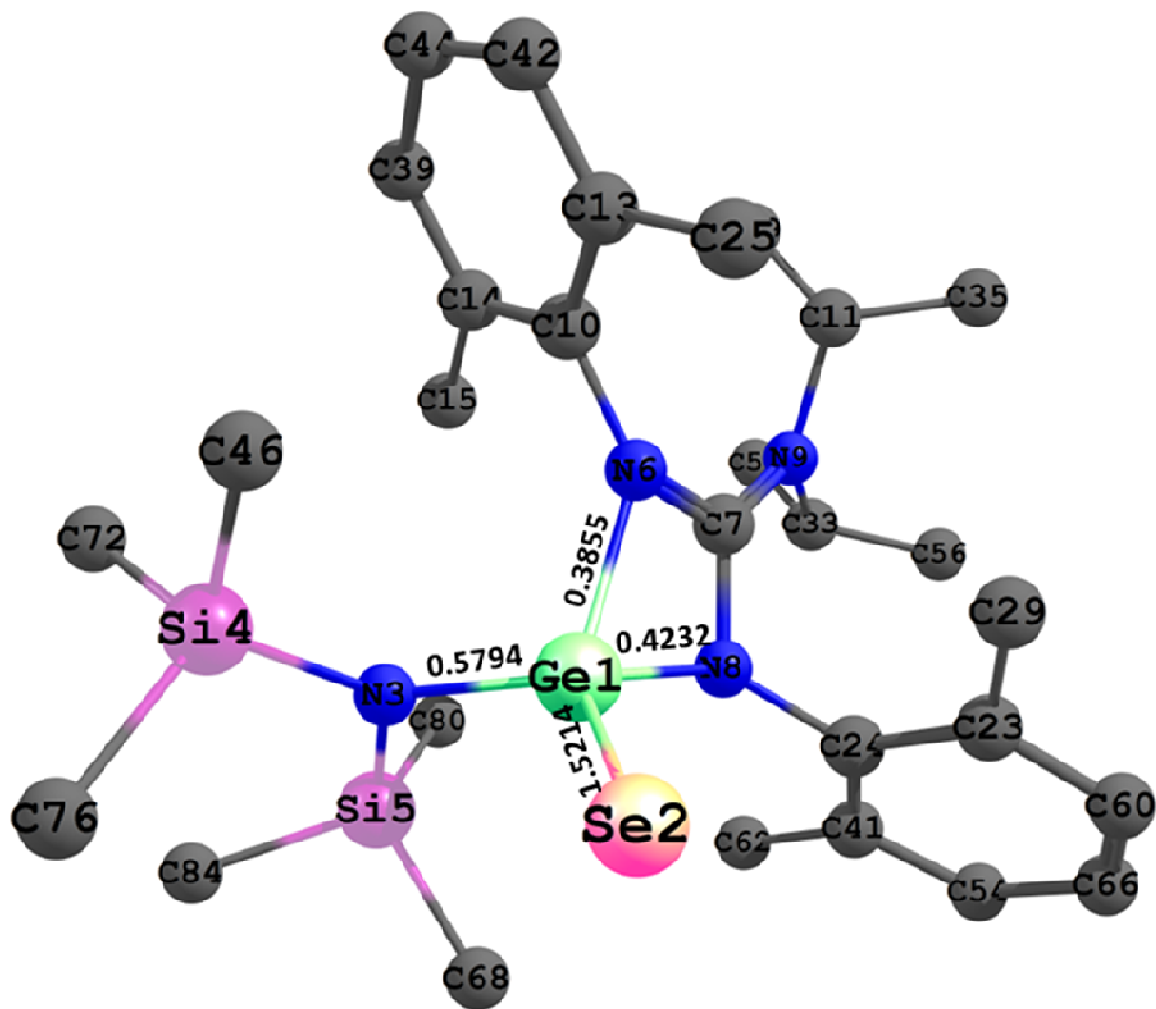

(40.48%) 0.6362\*Ge 1 s(54.66%)p 0.82(45.01%)d 0.01(0.33%)

(59.52%) 0.7715\*S 2 s(16.57%)p 5.02(83.16%)d 0.02(0.27%)

**Fig S13:** Wiberg Bond Index (WBI) was computed at B3LYP/6-31+G(d) level of theory for compound **3**

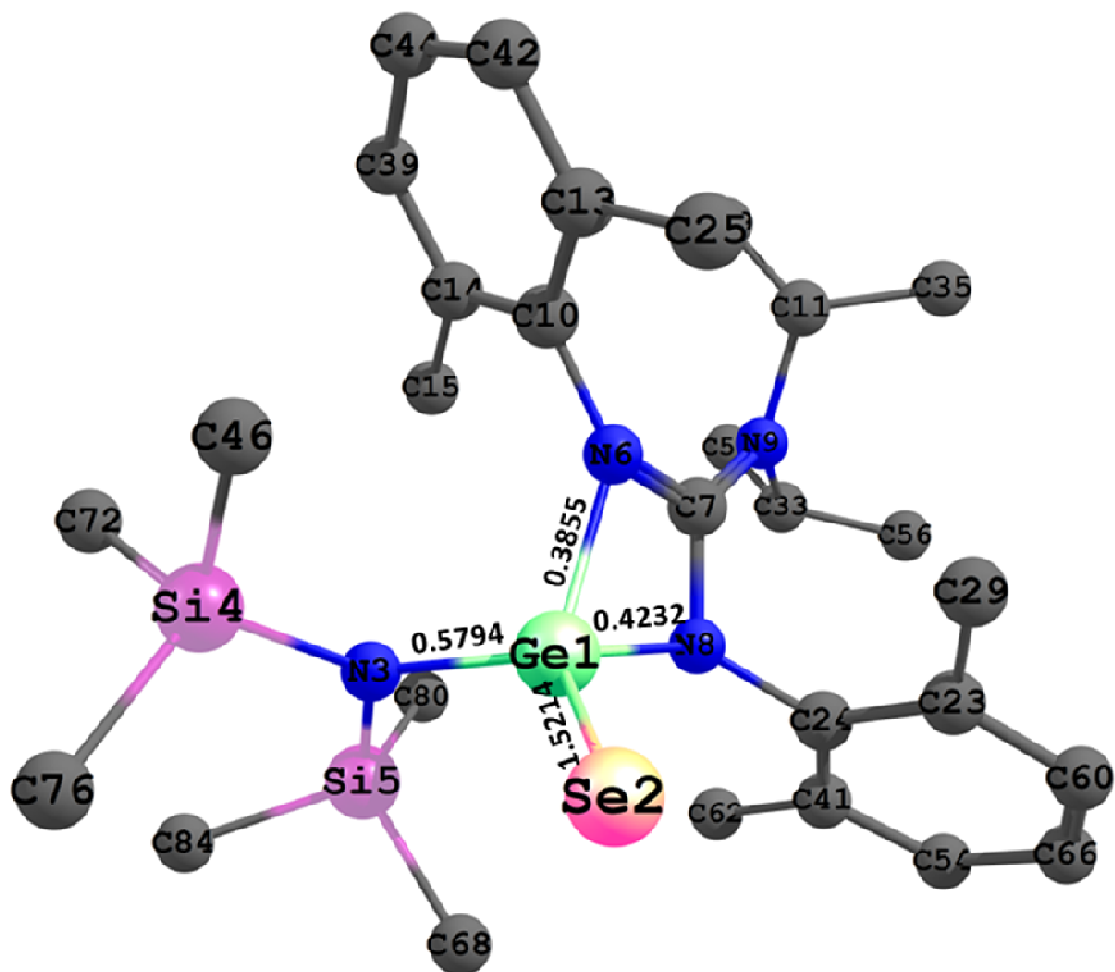

(44.79%) 0.6693\*Ge 1 s( 55.41%)p 0.80( 44.22%)d 0.01( 0.37%)

(55.21%) 0.7430\*Se 2 s( 13.36%)p 6.47( 86.53%)d 0.01( 0.11%)

**Fig S14:** Wiberg Bond Index (WBI) was computed at B3LYP/6-31+G(d) level of theory for compound **4**
